# Supplementary material for: Metabolomic and Functional Genomic Analyses Reveal Varietal Differences in Bioactive Compounds of Cooked Rice
Source: PubMed Central journal article supplement (PMC2944836; doi:10.1371/journal.pone.0012915), 2010-09-23
Supplement: pone.0012915.s002.pdf [file pone.0012915.s002.pdf]

**Table S1. Genes associated with linolenic acid, phenolics, phytosterol, and vitamin E synthesis.**

| <b>LocusID</b>   | <b>Enzymatic activity</b>                                                           | <b>SNPID</b> | <b>Class</b>   | <b>Pathway</b>               |
|------------------|-------------------------------------------------------------------------------------|--------------|----------------|------------------------------|
| LOC_Os07g49310   | omega-3 fatty acid desaturase                                                       | TBGI337504   | Linolenic acid | lipid desaturation           |
| LOC_Os07g49310   | omega-3 fatty acid desaturase                                                       | TBGI337502   | Linolenic acid | lipid desaturation           |
| LOC_Os08g34220   | omega-6 fatty acid desaturase                                                       | TBGI358296   | Linolenic acid | lipid desaturation           |
| LOC_Os08g34220   | omega-6 fatty acid desaturase                                                       | TBGI358297   | Linolenic acid | lipid desaturation           |
| LOC_Os08g34220   | omega-6 fatty acid desaturase                                                       | TBGI358298   | Linolenic acid | lipid desaturation           |
| LOC_Os08g34220   | omega-6 fatty acid desaturase                                                       | TBGI358299   | Linolenic acid | lipid desaturation           |
| LOC_Os08g34220   | omega-6 fatty acid desaturase                                                       | TBGI358300   | Linolenic acid | lipid desaturation           |
| LOC_Os08g34220   | omega-6 fatty acid desaturase                                                       | TBGI358301   | Linolenic acid | lipid desaturation           |
| LOC_Os02g48560   | omega-6 fatty acid desaturase, endoplasmic reticulum isozyme 2, putative, expressed | no SNP       | Linolenic acid | lipid desaturation           |
| LOC_Os03g18070   | omega-3 fatty acid desaturase                                                       | no SNP       | Linolenic acid | lipid desaturation           |
| LOC_Os07g23410   | omega-6 fatty acid desaturase, endoplasmic reticulum isozyme 2, putative, expressed | no SNP       | Linolenic acid | lipid desaturation           |
| LOC_Os07g23430   | omega-6 fatty acid desaturase, endoplasmic reticulum isozyme 2, putative, expressed | no SNP       | Linolenic acid | lipid desaturation           |
| LOC_Os11g01340   | omega-3 fatty acid desaturase                                                       | no SNP       | Linolenic acid | lipid desaturation           |
| LOC_Os12g01370   | omega-3 fatty acid desaturase                                                       | no SNP       | Linolenic acid | lipid desaturation           |
| LOC_Os07g49310   | omega-3 fatty acid desaturase                                                       | TBGI337504   | Linolenic acid | lipid desaturation           |
| LOC_Os07g49310   | omega-3 fatty acid desaturase                                                       | TBGI337502   | Linolenic acid | lipid desaturation           |
| LOC_Os01g60450   | trans-cinnamate 4-monooxygenase                                                     | TBGI059140   | Phenolic       | phenylpropanoid biosynthesis |
| LOC_Os02g41630   | phenylalanine ammonia-lyase                                                         | TBGI107353   | Phenolic       | phenylpropanoid biosynthesis |
| LOC_Os02g41670   | phenylalanine ammonia-lyase                                                         | TBGI107368   | Phenolic       | phenylpropanoid biosynthesis |
| LOC_Os02g41680   | phenylalanine ammonia-lyase                                                         | TBGI107403   | Phenolic       | phenylpropanoid biosynthesis |
| LOC_Os02g46970   | 4-coumarate-CoA ligase                                                              | TBGI111976   | Phenolic       | phenylpropanoid biosynthesis |
| LOC_Os03g02180   | ferulate 5-hydroxylase                                                              | TBGI124364   | Phenolic       | phenylpropanoid biosynthesis |
| LOC_Os06g24180   | ferulate 5-hydroxylase                                                              | TBGI289865   | Phenolic       | phenylpropanoid biosynthesis |
| LOC_Os06g24180   | ferulate 5-hydroxylase                                                              | TBGI289869   | Phenolic       | phenylpropanoid biosynthesis |
| LOC_Os08g14760   | 4-coumarate-CoA ligase                                                              | TBGI347005   | Phenolic       | phenylpropanoid biosynthesis |
| LOC_Os12g33610   | phenylalanine ammonia-lyase                                                         | TBGI479943   | Phenolic       | phenylpropanoid biosynthesis |
| LOC_Os12g33610   | phenylalanine ammonia-lyase                                                         | TBGI479945   | Phenolic       | phenylpropanoid biosynthesis |
| LOC_Os02g41630   | phenylalanine ammonia-lyase                                                         | TBGI107339   | Phenolic       | phenylpropanoid biosynthesis |
| LOC_Os02g41630   | phenylalanine ammonia-lyase                                                         | TBGI107343   | Phenolic       | phenylpropanoid biosynthesis |
| LOC_Os02g41630   | phenylalanine ammonia-lyase                                                         | TBGI107344   | Phenolic       | phenylpropanoid biosynthesis |
| LOC_Os02g41630   | phenylalanine ammonia-lyase                                                         | TBGI107349   | Phenolic       | phenylpropanoid biosynthesis |
| LOC_Os02g41630   | phenylalanine ammonia-lyase                                                         | TBGI107350   | Phenolic       | phenylpropanoid biosynthesis |
| LOC_Os02g41630   | phenylalanine ammonia-lyase                                                         | TBGI107351   | Phenolic       | phenylpropanoid biosynthesis |
| LOC_Os02g41630   | phenylalanine ammonia-lyase                                                         | TBGI107352   | Phenolic       | phenylpropanoid biosynthesis |
| LOC_Os02g41670   | phenylalanine ammonia-lyase                                                         | TBGI107357   | Phenolic       | phenylpropanoid biosynthesis |
| LOC_Os02g41680   | phenylalanine ammonia-lyase                                                         | TBGI107397   | Phenolic       | phenylpropanoid biosynthesis |
| LOC_Os02g41680   | phenylalanine ammonia-lyase                                                         | TBGI107399   | Phenolic       | phenylpropanoid biosynthesis |
| LOC_Os03g02180   | ferulate 5-hydroxylase                                                              | TBGI124360   | Phenolic       | phenylpropanoid biosynthesis |
| LOC_Os02g41680   | phenylalanine ammonia-lyase                                                         | TBGI107408   | Phenolic       | phenylpropanoid biosynthesis |
| LOC_Os01g60450   |                                                                                     | TBGI059143   | Phenolic       | phenylpropanoid biosynthesis |
| LOC_Os01g60450   |                                                                                     | TBGI059145   | Phenolic       | phenylpropanoid biosynthesis |
| LOC_Os02g46970   | 4-coumarate-CoA ligase                                                              | TBGI111975   | Phenolic       | phenylpropanoid biosynthesis |
| LOC_Os06g24180   | ferulate 5-hydroxylase                                                              | TBGI289866   | Phenolic       | phenylpropanoid biosynthesis |
| LOC_Os06g24180   | ferulate 5-hydroxylase                                                              | TBGI289873   | Phenolic       | phenylpropanoid biosynthesis |
| LOC_Os06g24180   | ferulate 5-hydroxylase                                                              | TBGI289874   | Phenolic       | phenylpropanoid biosynthesis |
| LOC_Os06g24180   | ferulate 5-hydroxylase                                                              | TBGI289875   | Phenolic       | phenylpropanoid biosynthesis |
| LOC_Os08g14760   | 4-coumarate-CoA ligase                                                              | TBGI347006   | Phenolic       | phenylpropanoid biosynthesis |
| LOC_Os08g14760   | 4-coumarate-CoA ligase                                                              | TBGI347008   | Phenolic       | phenylpropanoid biosynthesis |
| LOC_Os08g14760   | 4-coumarate-CoA ligase                                                              | TBGI347011   | Phenolic       | phenylpropanoid biosynthesis |
| LOC_Os01g60450   | phenylpropanoid biosynthesis                                                        | TBGI059141   | Phenolic       | phenylpropanoid biosynthesis |
| LOC_Os01g60450   | phenylpropanoid biosynthesis                                                        | TBGI059147   | Phenolic       | phenylpropanoid biosynthesis |
| LOC_Os01g60450.6 | phenylpropanoid biosynthesis                                                        | TBGI059151   | Phenolic       | phenylpropanoid biosynthesis |
| LOC_Os02g41630   | phenylalanine ammonia-lyase                                                         | TBGI107354   | Phenolic       | phenylpropanoid biosynthesis |
| LOC_Os02g41630   | phenylalanine ammonia-lyase                                                         | TBGI107355   | Phenolic       | phenylpropanoid biosynthesis |
| LOC_Os02g41670   | phenylalanine ammonia-lyase                                                         | TBGI107371   | Phenolic       | phenylpropanoid biosynthesis |
| LOC_Os02g41680   | phenylalanine ammonia-lyase                                                         | TBGI107406   | Phenolic       | phenylpropanoid biosynthesis |
| LOC_Os05g35290   | phenylalanine ammonia-lyase                                                         | TBGI250746   | Phenolic       | phenylpropanoid biosynthesis |
| LOC_Os05g35290   | phenylalanine ammonia-lyase                                                         | TBGI250747   | Phenolic       | phenylpropanoid biosynthesis |
| LOC_Os06g24180   | ferulate 5-hydroxylase                                                              | TBGI289867   | Phenolic       | phenylpropanoid biosynthesis |
| LOC_Os06g24180   | ferulate 5-hydroxylase                                                              | TBGI289868   | Phenolic       | phenylpropanoid biosynthesis |

|                |                                                                      |            |             |                                                                       |
|----------------|----------------------------------------------------------------------|------------|-------------|-----------------------------------------------------------------------|
| LOC_Os06g24180 | ferulate 5-hydroxylase                                               | TBGI289872 | Phenolic    | phenylpropanoid biosynthesis                                          |
| LOC_Os08g14760 | 4-coumarate-CoA ligase                                               | TBGI347003 | Phenolic    | phenylpropanoid biosynthesis                                          |
| LOC_Os08g14760 | 4-coumarate-CoA ligase                                               | TBGI347004 | Phenolic    | phenylpropanoid biosynthesis                                          |
| LOC_Os08g14760 | 4-coumarate-CoA ligase                                               | TBGI347009 | Phenolic    | phenylpropanoid biosynthesis                                          |
| LOC_Os08g14760 | 4-coumarate-CoA ligase                                               | TBGI347010 | Phenolic    | phenylpropanoid biosynthesis                                          |
| LOC_Os12g33610 | phenylalanine ammonia-lyase                                          | TBGI479929 | Phenolic    | phenylpropanoid biosynthesis                                          |
| LOC_Os12g33610 | phenylalanine ammonia-lyase                                          | TBGI479935 | Phenolic    | phenylpropanoid biosynthesis                                          |
| LOC_Os12g33610 | phenylalanine ammonia-lyase                                          | TBGI479941 | Phenolic    | phenylpropanoid biosynthesis                                          |
| LOC_Os12g33610 | phenylalanine ammonia-lyase                                          | TBGI479944 | Phenolic    | phenylpropanoid biosynthesis                                          |
| LOC_Os12g33610 | phenylalanine ammonia-lyase                                          | TBGI479949 | Phenolic    | phenylpropanoid biosynthesis                                          |
| LOC_Os04g43760 | phenylalanine ammonia-lyase                                          | no SNP     | Phenolic    | phenylpropanoid biosynthesis                                          |
| LOC_Os06g06980 | caffeoyl-CoA O-methyltransferase                                     | no SNP     | Phenolic    | phenylpropanoid biosynthesis                                          |
| LOC_Os08g38900 | caffeoyl-CoA O-methyltransferase                                     | no SNP     | Phenolic    | phenylpropanoid biosynthesis                                          |
| LOC_Os08g38910 | caffeoyl-CoA O-methyltransferase                                     | no SNP     | Phenolic    | phenylpropanoid biosynthesis                                          |
| LOC_Os08g38920 | caffeoyl-CoA O-methyltransferase                                     | no SNP     | Phenolic    | phenylpropanoid biosynthesis                                          |
| LOC_Os09g30360 | caffeoyl-CoA O-methyltransferase                                     | no SNP     | Phenolic    | phenylpropanoid biosynthesis                                          |
| LOC_Os10g36848 | ferulate 5-hydroxylase                                               | no SNP     | Phenolic    | phenylpropanoid biosynthesis                                          |
| LOC_Os11g48110 | phenylalanine ammonia-lyase                                          | no SNP     | Phenolic    | phenylpropanoid biosynthesis                                          |
| LOC_Os06g24180 | ferulate 5-hydroxylase                                               | TBGI289864 | Phenolic    | phenylpropanoid biosynthesis                                          |
| LOC_Os01g27490 | leucoanthocyanidin dioxygenase                                       | TBGI028393 | Phenolic    | flavanoid biosynthesis                                                |
| LOC_Os01g27490 | leucoanthocyanidin dioxygenase                                       | TBGI028394 | Phenolic    | flavanoid biosynthesis                                                |
| LOC_Os01g27490 | leucoanthocyanidin dioxygenase                                       | TBGI028395 | Phenolic    | flavanoid biosynthesis                                                |
| LOC_Os01g27490 | leucoanthocyanidin dioxygenase                                       | TBGI028396 | Phenolic    | flavanoid biosynthesis                                                |
| LOC_Os06g42130 | leucoanthocyanidin dioxygenase                                       | TBGI304688 | Phenolic    | flavanoid biosynthesis                                                |
| LOC_Os06g42130 | leucoanthocyanidin dioxygenase                                       | TBGI304691 | Phenolic    | flavanoid biosynthesis                                                |
| LOC_Os01g27490 | leucoanthocyanidin dioxygenase                                       | TBGI028392 | Phenolic    | flavanoid biosynthesis                                                |
| LOC_Os03g60509 | putative chalcone isomerase                                          | TBGI173576 | Phenolic    | flavanoid biosynthesis                                                |
| LOC_Os01g27490 | leucoanthocyanidin dioxygenase                                       | TBGI028398 | Phenolic    | flavanoid biosynthesis                                                |
| LOC_Os01g27490 | leucoanthocyanidin dioxygenase                                       | TBGI028400 | Phenolic    | flavanoid biosynthesis                                                |
| LOC_Os01g44260 | dihydroflavonol-4-reductase                                          | no SNP     | Phenolic    | flavanoid biosynthesis                                                |
| LOC_Os04g56700 | naringenin,2-oxoglutarate 3-dioxygenase                              | no SNP     | Phenolic    | flavanoid biosynthesis                                                |
| LOC_Os07g11440 | putative chalcone synthase                                           | no SNP     | Phenolic    | flavanoid biosynthesis                                                |
| LOC_Os10g17260 | flavanoid 3-monooxygenase                                            | no SNP     | Phenolic    | flavanoid biosynthesis                                                |
| LOC_Os11g32650 | putative chalcone synthase                                           | no SNP     | Phenolic    | flavanoid biosynthesis                                                |
| LOC_Os09g19734 | isochorismate synthase 1, chloroplast precursor, putative, expressed | no SNP     | Phenolic    | via chorismate, pyruvate pathway                                      |
| LOC_Os08g35310 | isoflavone-7-O-methyltransferase 9                                   | TBGI359460 | Phenolic    | flavanoid biosynthesis                                                |
| LOC_Os08g35310 | isoflavone-7-O-methyltransferase 9                                   | TBGI359464 | Phenolic    | flavanoid biosynthesis                                                |
| LOC_Os08g35310 | isoflavone-7-O-methyltransferase 9                                   | TBGI359466 | Phenolic    | flavanoid biosynthesis                                                |
| LOC_Os08g35310 | isoflavone-7-O-methyltransferase 9                                   | TBGI359467 | Phenolic    | flavanoid biosynthesis                                                |
| LOC_Os10g16974 | flavonoid 3-hydroxylase                                              | TBGI400908 | Phenolic    | leucodelphinidin biosynthesis (dihydrotricin (demethylated tricetin)) |
| LOC_Os10g16974 | flavonoid 3-hydroxylase                                              | TBGI400906 | Phenolic    | leucodelphinidin biosynthesis (dihydrotricin (demethylated tricetin)) |
| LOC_Os08g35310 | isoflavone-7-O-methyltransferase 9                                   | TBGI359462 | Phenolic    | flavanoid biosynthesis                                                |
| LOC_Os08g35310 | isoflavone-7-O-methyltransferase 9                                   | TBGI359463 | Phenolic    | flavanoid biosynthesis                                                |
| LOC_Os10g16974 | flavonoid 3-hydroxylase                                              | TBGI400913 | Phenolic    | leucodelphinidin biosynthesis (dihydrotricin (demethylated tricetin)) |
| LOC_Os10g16974 | flavonoid 3-hydroxylase                                              | TBGI400915 | Phenolic    | leucodelphinidin biosynthesis (dihydrotricin (demethylated tricetin)) |
| LOC_Os10g16974 | flavonoid 3-hydroxylase                                              | TBGI400916 | Phenolic    | leucodelphinidin biosynthesis (dihydrotricin (demethylated tricetin)) |
| LOC_Os10g16974 | flavonoid 3-hydroxylase                                              | TBGI400920 | Phenolic    | leucodelphinidin biosynthesis (dihydrotricin (demethylated tricetin)) |
| LOC_Os08g35310 | isoflavone-7-O-methyltransferase 9                                   | TBGI359465 | Phenolic    | flavanoid biosynthesis                                                |
| LOC_Os09g09230 | dihydroflavonol-4-reductase, putative                                | no SNP     | Phenolic    | leucodelphinidin biosynthesis (dihydrotricin (demethylated tricetin)) |
| LOC_Os10g17260 | flavonoid 3-hydroxylase                                              | no SNP     | Phenolic    | leucodelphinidin biosynthesis (dihydrotricin (demethylated tricetin)) |
| LOC_Os05g34380 | cytochrome P450 51, putative                                         | TBGI249857 | Phytosterol | sterol synthesis                                                      |

|                |                                                                |            |             |                        |
|----------------|----------------------------------------------------------------|------------|-------------|------------------------|
| LOC_Os07g37980 | cytochrome P450 51, putative                                   | TBGI329832 | Phytosterol | sterol synthesis       |
| LOC_Os03g59040 | farnesyl-diphosphate<br>farnesyltransferase                    | TBGI172275 | Phytosterol | sterol synthesis       |
| LOC_Os03g59040 | farnesyl-diphosphate<br>farnesyltransferase                    | TBGI172276 | Phytosterol | sterol synthesis       |
| LOC_Os03g59040 | farnesyl-diphosphate<br>farnesyltransferase                    | TBGI172274 | Phytosterol | sterol synthesis       |
| LOC_Os07g10130 | farnesyl-diphosphate<br>farnesyltransferase                    | TBGI317153 | Phytosterol | sterol synthesis       |
| LOC_Os07g10600 | sterol 24-C-methyltransferase                                  | TBGI317459 | Phytosterol | sterol synthesis       |
| LOC_Os07g10600 | sterol 24-C-methyltransferase                                  | TBGI317461 | Phytosterol | sterol synthesis       |
| LOC_Os07g37970 | cytochrome P450 51, putative                                   | TBGI329813 | Phytosterol | sterol synthesis       |
| LOC_Os07g37980 | cytochrome P450 51, putative                                   | TBGI329833 | Phytosterol | sterol synthesis       |
| LOC_Os07g37980 | cytochrome P450 51, putative                                   | TBGI329834 | Phytosterol | sterol synthesis       |
| LOC_Os07g37980 | cytochrome P450 51, putative                                   | TBGI329836 | Phytosterol | sterol synthesis       |
| LOC_Os07g37980 | cytochrome P450 51, putative                                   | TBGI329837 | Phytosterol | sterol synthesis       |
| LOC_Os07g37980 | cytochrome P450 51, putative                                   | TBGI329840 | Phytosterol | sterol synthesis       |
| LOC_Os07g37980 | cytochrome P450 51, putative                                   | TBGI329843 | Phytosterol | sterol synthesis       |
| LOC_Os09g39220 | C-14 sterol reductase                                          | TBGI391322 | Phytosterol | sterol synthesis       |
| LOC_Os09g39220 | C-14 sterol reductase                                          | TBGI391323 | Phytosterol | sterol synthesis       |
| LOC_Os09g39220 | C-14 sterol reductase                                          | TBGI391329 | Phytosterol | sterol synthesis       |
| LOC_Os05g34380 | cytochrome P450 51, putative                                   | TBGI249853 | Phytosterol | sterol synthesis       |
| LOC_Os05g34380 | cytochrome P450 51, putative                                   | TBGI249858 | Phytosterol | sterol synthesis       |
| LOC_Os05g34380 | cytochrome P450 51, putative                                   | TBGI249862 | Phytosterol | sterol synthesis       |
| LOC_Os07g37970 | cytochrome P450 51, putative                                   | TBGI329817 | Phytosterol | sterol synthesis       |
| LOC_Os01g01369 | 3-beta-hydroxysteroid-delta-<br>isomerase, putative, expressed | no SNP     | Phytosterol | sterol synthesis       |
| LOC_Os01g25189 | C-14 sterol reductase                                          | no SNP     | Phytosterol | sterol synthesis       |
| LOC_Os02g04760 | cycloartenol synthase, putative                                | no SNP     | Phytosterol | sterol synthesis       |
| LOC_Os02g26650 | sterol delta7 reductase                                        | no SNP     | Phytosterol | sterol synthesis       |
| LOC_Os03g04340 | S-adenosylmethionine-dependent<br>methyltransferase            | no SNP     | Phytosterol | sterol synthesis       |
| LOC_Os05g14800 | cycloartenol synthase, putative                                | no SNP     | Phytosterol | sterol synthesis       |
| LOC_Os07g28110 | cytochrome P450 51, putative                                   | no SNP     | Phytosterol | sterol synthesis       |
| LOC_Os07g28160 | cytochrome P450 51, putative                                   | no SNP     | Phytosterol | sterol synthesis       |
| LOC_Os11g18310 | cycloartenol synthase, putative                                | no SNP     | Phytosterol | sterol synthesis       |
| LOC_Os11g18340 | cycloartenol synthase, putative                                | no SNP     | Phytosterol | sterol synthesis       |
| LOC_Os11g19700 | cycloeucaenol cycloisomerase                                   | no SNP     | Phytosterol | sterol synthesis       |
| LOC_Os02g17920 | 4-hydroxyphenylpyruvate<br>dioxygenase                         | TBGI090438 | Vitamin E   | vitamin E biosynthesis |
| LOC_Os02g17920 | 4-hydroxyphenylpyruvate<br>dioxygenase                         | TBGI090439 | Vitamin E   | vitamin E biosynthesis |
| LOC_Os02g17920 | 4-hydroxyphenylpyruvate<br>dioxygenase                         | TBGI090428 | Vitamin E   | vitamin E biosynthesis |
| LOC_Os02g17920 | 4-hydroxyphenylpyruvate<br>dioxygenase                         | TBGI090429 | Vitamin E   | vitamin E biosynthesis |
| LOC_Os02g17920 | 4-hydroxyphenylpyruvate<br>dioxygenase                         | TBGI090441 | Vitamin E   | vitamin E biosynthesis |
| LOC_Os08g09250 | 4-hydroxyphenylpyruvate<br>dioxygenase                         | TBGI343503 | Vitamin E   | vitamin E biosynthesis |
| LOC_Os08g09250 | 4-hydroxyphenylpyruvate<br>dioxygenase                         | TBGI343504 | Vitamin E   | vitamin E biosynthesis |
| LOC_Os02g07160 | 4-hydroxyphenylpyruvate<br>dioxygenase                         | TBGI081638 | Vitamin E   | vitamin E biosynthesis |
| LOC_Os02g17650 | tocopherol cyclase                                             | TBGI090186 | Vitamin E   | vitamin E biosynthesis |
| LOC_Os02g17650 | tocopherol cyclase                                             | TBGI090187 | Vitamin E   | vitamin E biosynthesis |
| LOC_Os02g17650 | tocopherol cyclase                                             | TBGI090190 | Vitamin E   | vitamin E biosynthesis |
| LOC_Os02g17650 | tocopherol cyclase                                             | TBGI090191 | Vitamin E   | vitamin E biosynthesis |
| LOC_Os02g17650 | tocopherol cyclase                                             | TBGI090193 | Vitamin E   | vitamin E biosynthesis |
| LOC_Os02g17650 | tocopherol cyclase                                             | TBGI090195 | Vitamin E   | vitamin E biosynthesis |
| LOC_Os02g17920 | 4-hydroxyphenylpyruvate<br>dioxygenase                         | TBGI090432 | Vitamin E   | vitamin E biosynthesis |
| LOC_Os02g17920 | 4-hydroxyphenylpyruvate<br>dioxygenase                         | TBGI090436 | Vitamin E   | vitamin E biosynthesis |
| LOC_Os02g17920 | 4-hydroxyphenylpyruvate<br>dioxygenase                         | TBGI090437 | Vitamin E   | vitamin E biosynthesis |
| LOC_Os05g14194 | 4-hydroxyphenylpyruvate<br>dioxygenase                         | TBGI236102 | Vitamin E   | vitamin E biosynthesis |
| LOC_Os05g14194 | 4-hydroxyphenylpyruvate<br>dioxygenase                         | TBGI236103 | Vitamin E   | vitamin E biosynthesis |

|                |                                              |            |                |                         |
|----------------|----------------------------------------------|------------|----------------|-------------------------|
| LOC_Os05g14194 | 4-hydroxyphenylpyruvate dioxygenase          | TBGI236108 | Vitamin E      | vitamin E biosynthesis  |
| LOC_Os05g14194 | 4-hydroxyphenylpyruvate dioxygenase          | TBGI236109 | Vitamin E      | vitamin E biosynthesis  |
| LOC_Os02g17650 | tocopherol cyclase                           | TBGI090196 | Vitamin E      | vitamin E biosynthesis  |
| LOC_Os12g42090 | tocopherol cyclase                           | TBGI489786 | Vitamin E      | vitamin E biosynthesis  |
| LOC_Os02g47310 | tocopherol O-methyltransferase               | no SNP     | Vitamin E      | vitamin E Biosynthesis  |
| LOC_Os06g43880 | homogentisic acid geranylgeranyl transferase | no SNP     | Vitamin E      | vitamin E Biosynthesis  |
| LOC_Os06g44840 | homogentisate phytyltransferase              | no SNP     | Vitamin E      | vitamin E biosynthesis  |
| LOC_Os07g49310 | omega-3 fatty acid desaturase                | TBGI337504 | Linolenic acid | glycolipid desaturation |
| LOC_Os07g49310 | omega-3 fatty acid desaturase                | TBGI337502 | Linolenic acid | glycolipid desaturation |
